# Supplementary material for: Fluorescent “AND” logic gates for simultaneous detection of thiols and protons: photophysical properties, mechanism and bioimaging of living cells
Source: Royal Society of Chemistry journal article supplement (doi:10.1039/d2ay01742c), 2023-01-01
Supplement: d2ay01742c1.pdf [file d2ay01742c1.pdf]

## Supporting Information

# Fluorescent “AND” logic gates for simultaneous detection of thiols and proton: photophysical properties, mechanism and bioimaging of living cells

Langping Zhou, Zhihao Yu, Guangzhu Zhang, Zechen Jin<sup>#</sup>, Weibing Zhang\* and Junhong Qian\*

Shanghai Key Laboratory of Functional Materials Chemistry, School of Chemistry & Molecular Engineering, East

China University of Science and Technology, Shanghai, 200237, China.

\*Corresponding author: Tel: +86-21-64252145; Fax: +86-21-64233161

E-mail: junhongqian@ecust.edu.cn; weibingzhang@ecust.edu.cn

<sup>#</sup>This author is currently studying in Shanghai Institute of Materia Medica, Chinese Academy of Sciences.

### Contents

|                                                                                                            |    |
|------------------------------------------------------------------------------------------------------------|----|
| Experimental Section .....                                                                                 | 2  |
| <sup>1</sup> H-NMR spectra of <b>m1</b> and <b>m4</b> .....                                                | 3  |
| <sup>1</sup> H-NMR, <sup>13</sup> C-NMR and ESI-MS spectra of <b>TP1</b> and <b>TP4</b> .....              | 4  |
| <sup>1</sup> H-NMR spectra of <b>m2</b> , <b>m3</b> and <b>m5</b> .....                                    | 6  |
| <sup>1</sup> H-NMR, <sup>13</sup> C-NMR and ESI-MS spectra of <b>TP2</b> , <b>TP3</b> and <b>TP5</b> ..... | 7  |
| pH-dependent absorption and emission spectra of <b>TP2-5</b> .....                                         | 10 |
| Absorption and emission spectra of <b>TP2-5</b> in the presence of thiol.....                              | 14 |
| Thiol and proton detection abilities of some reported fluorescent probes.....                              | 18 |
| Proposed reaction diagram between <b>TP1/TP2</b> and thiols.....                                           | 20 |
| HPLC spectra of Cys/GSH/Hcy- <b>TP1-3</b> system at different reaction time.....                           | 21 |
| The molecular orbitals of <b>TP1</b> , <b>TP3</b> , <b>TP4</b> and <b>TP5</b> .....                        | 24 |
| Confocal fluorescence imaging of HeLa cells stained with <b>TP1</b> and <b>TP3</b> .....                   | 26 |
| Confocal fluorescence imaging of L929 and HeLa cells stained with <b>TP4</b> .....                         | 28 |

## Experimental Section

### Calculation of fluorescence quantum yield

The fluorescence quantum yield of each probe was calculated according to the following equation with 4-amino-N-(*n*-butyl) naphthalimide as the reference ( $\Phi = 0.21$  in DMSO).

$$\Phi^S = \Phi^R \times (S^S/S^R) \times (n^S/n^R)^2 \times (A^R/A^S)$$

Where  $\Phi$  is the fluorescence quantum yield;  $A$  represents the absorbance at the excited wavelength;  $S$  is the integral area of the emission peak, and  $n$  is the refractive index of the solvent. The superscript “S” and “R” represent the sample and the reference, respectively.

### High-performance liquid chromatography (HPLC) traces

HPLC spectra were obtained on an iChrom 5100 LC system and a Sinopak C18 reversed-phase column (4.6 mm  $\times$  25 cm). The mobile phase was degassed with an ultrasonic device for 10 minutes. Mobile phase: A-water, B-acetonitrile; injection volume: 20  $\mu$ L; flow rate: 1.0 mL/min; detection wavelength: 450 nm; elution condition: gradient elution, 0-20 min 10-70% B, 20-21 min 70-10% B; Isocratic elution, 21-30 min 10% B.

### Computational methods

The density functional theory (DFT) was employed to optimize the structure of the probes through Gaussian 16. All structure optimizations were performed using DFT-M062X functionals and Def2SVP basis set for the ground states. Solvation effects were taken into account using the SMD mode and the solvent was the same as in the experiment (water). Frequency calculations were performed to confirm that we obtained stable structures without imaginary vibrational frequencies.

### Confocal fluorescence imaging

HeLa, RH30 and L929 cell lines (National Collection of Authenticated Cell Cultures, Shanghai, China) were cultured in Dulbecco's Modified Eagle Medium (High glucose) containing 10% fetal bovine serum and 1% penicillin-streptomycin at 37°C in an atmosphere of 5% CO<sub>2</sub>. The cells were transferred to confocal dishes and incubated for 24 h and followed by washed with PBS (20 mmol/L, pH 7.4) for three times. Then the cells were cultured with serum-free DEME medium containing probes (1  $\mu$ mol/L) for 30 min and washed with PBS for three times again.

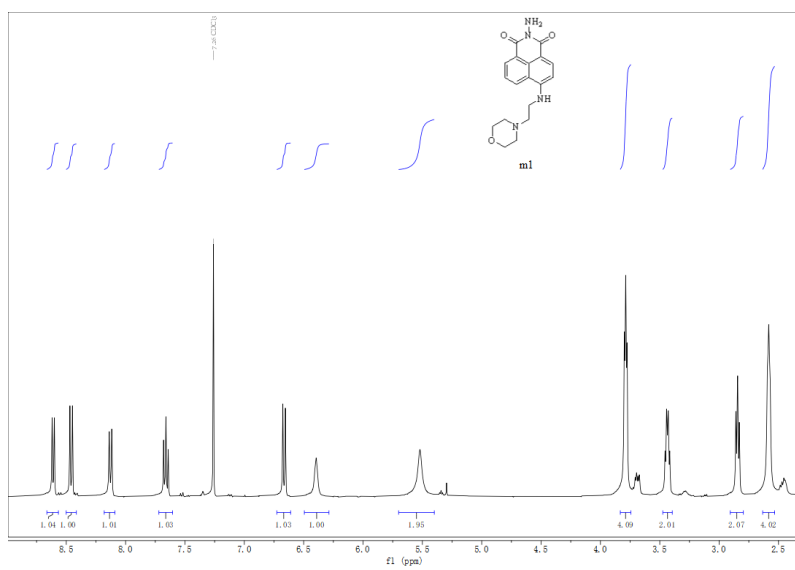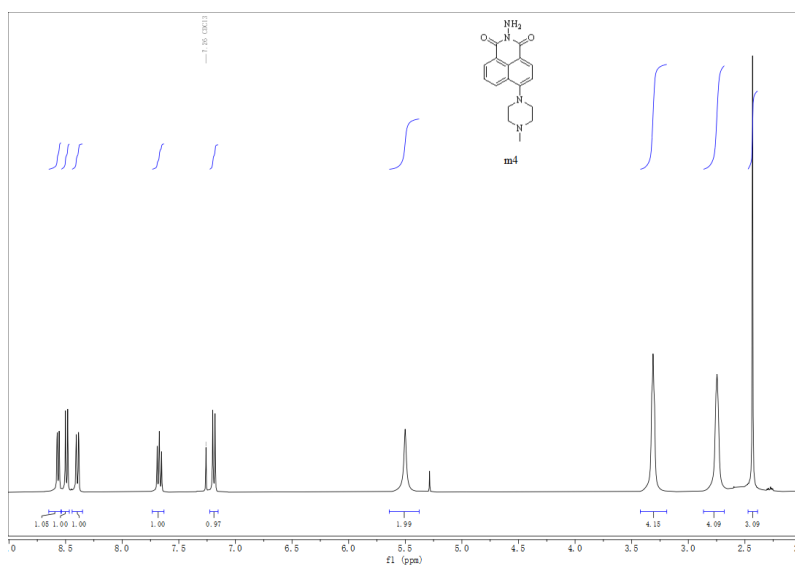

**Fig. S1** <sup>1</sup>H-NMR spectra of **m1** and **m4**.

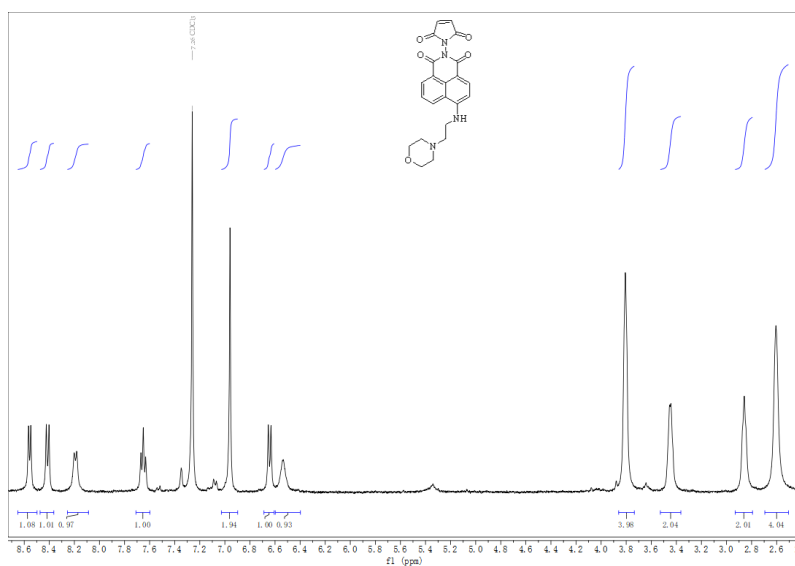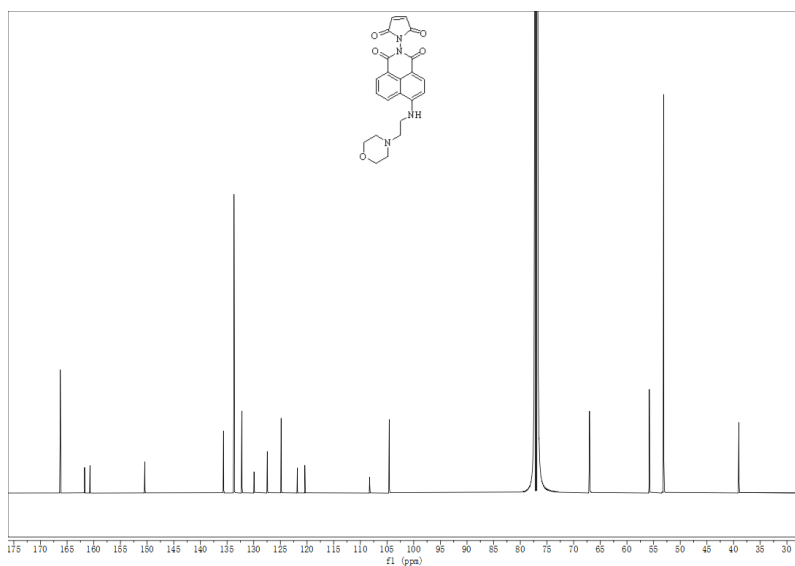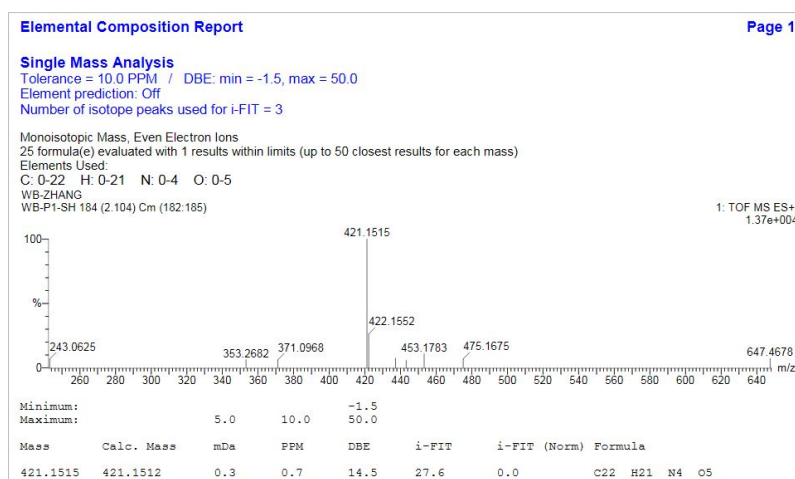

**Fig. S2** <sup>1</sup>H-NMR, <sup>13</sup>C-NMR and ESI-Mass spectra of **TP1**.

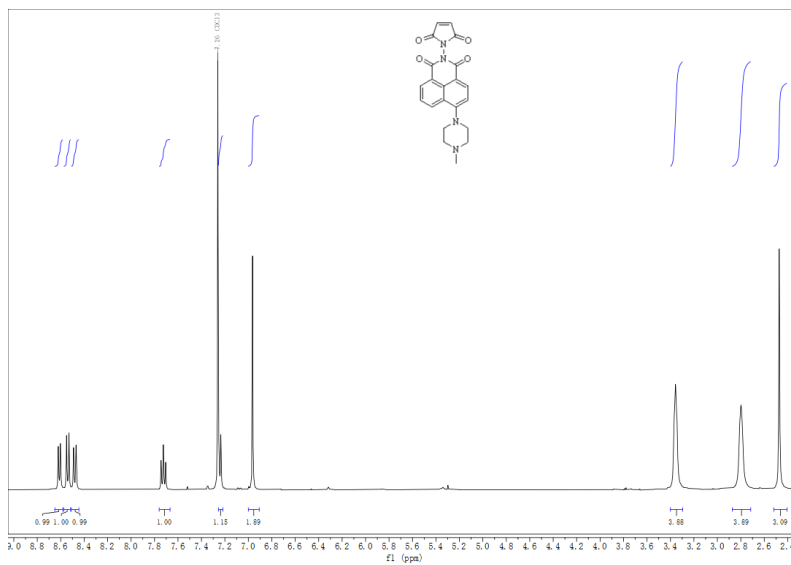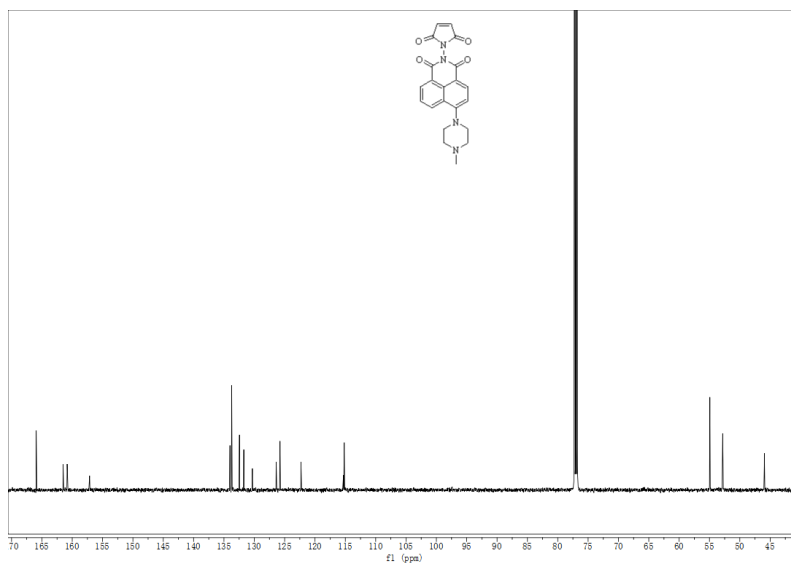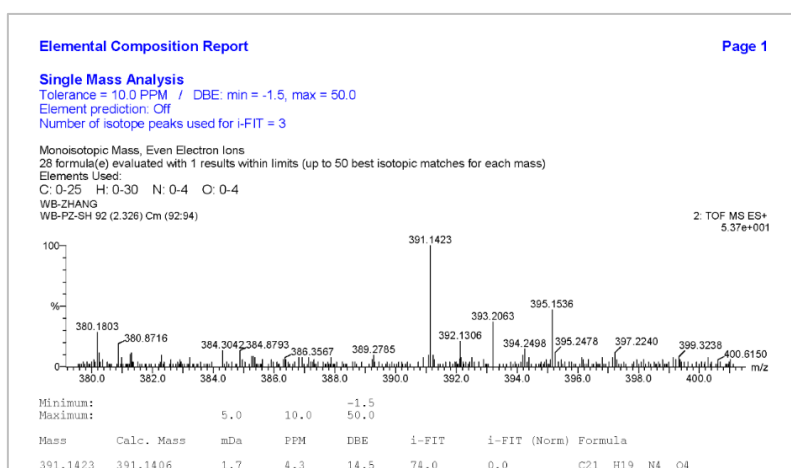

**Fig. S3**  $^1\text{H}$ -NMR,  $^{13}\text{C}$ -NMR and ESI-Mass spectra of **TP4**.

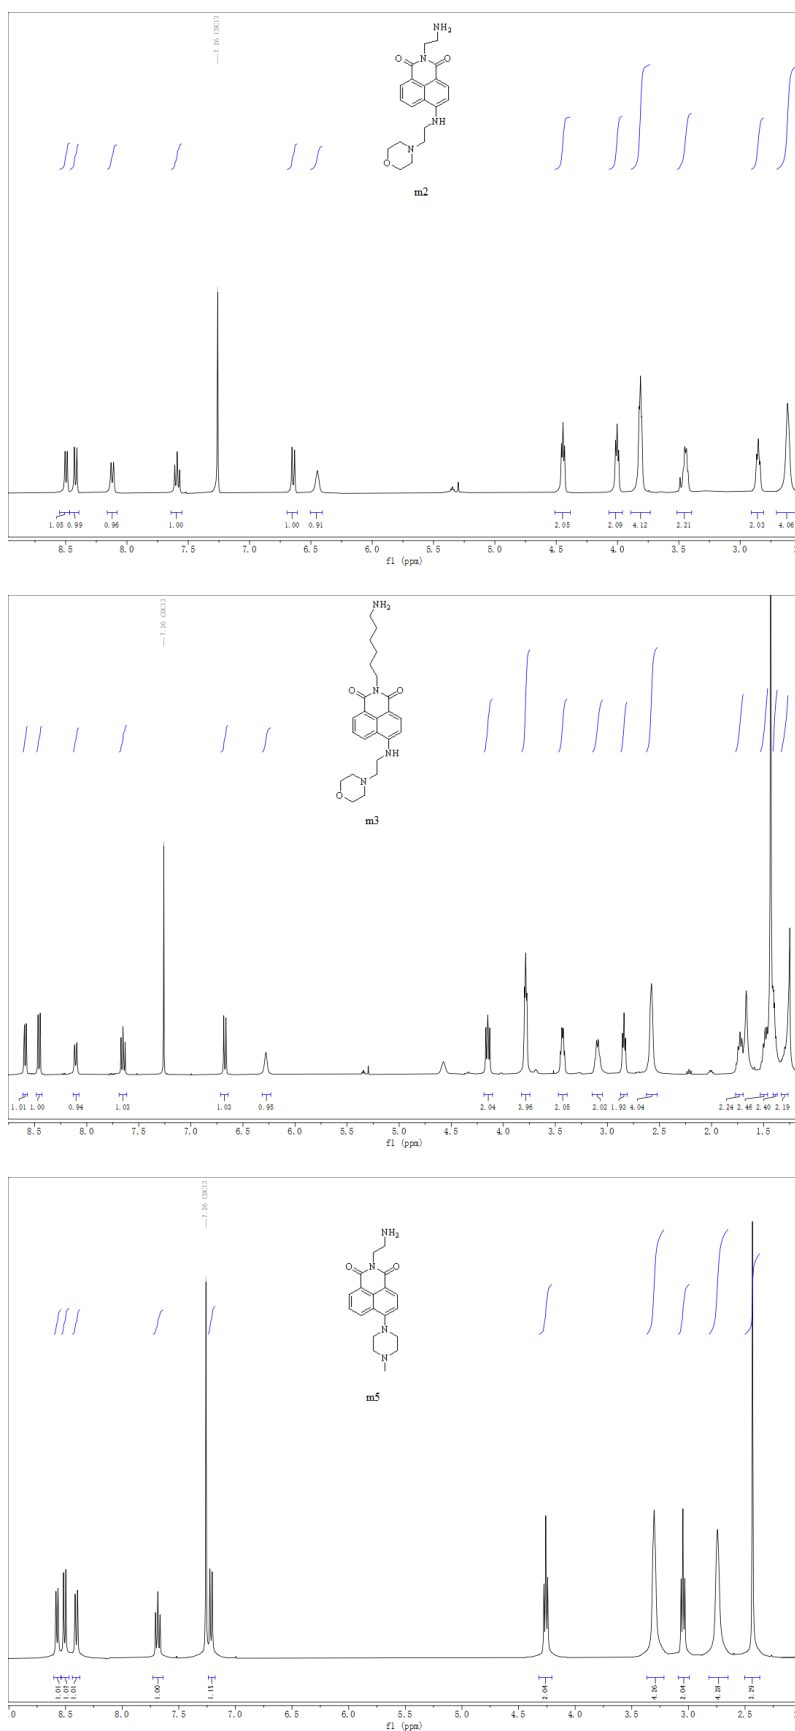

**Fig. S4**  $^1\text{H-NMR}$  spectra of **m2**, **m3** and **m5**.

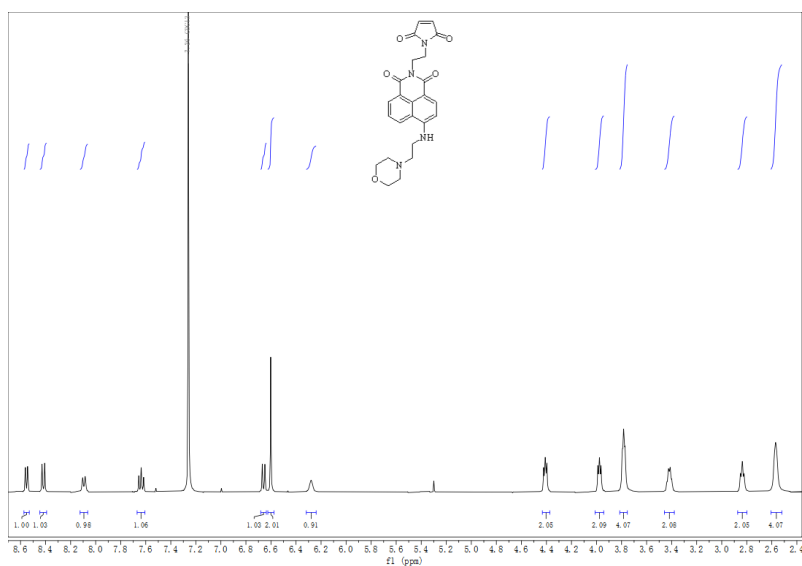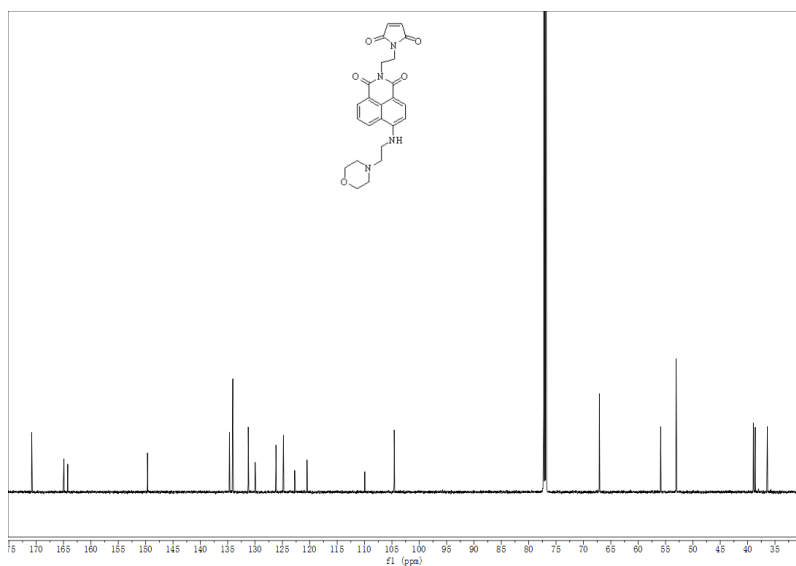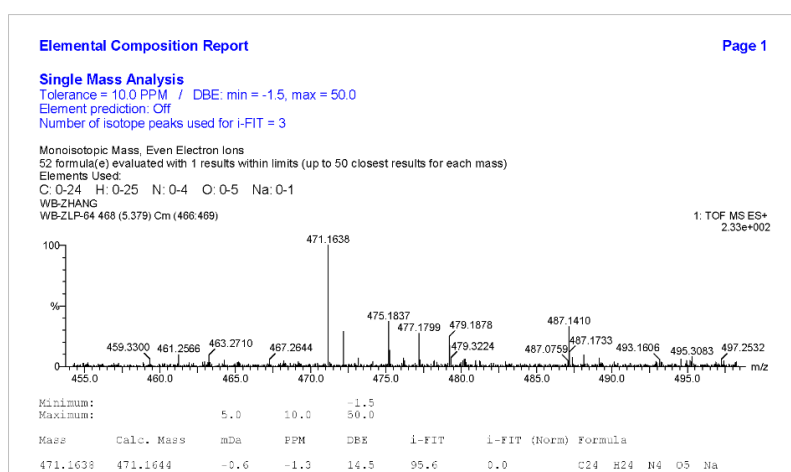

**Fig. S5**  $^1\text{H-NMR}$ ,  $^{13}\text{C-NMR}$  and ESI-Mass spectra of **TP2**.

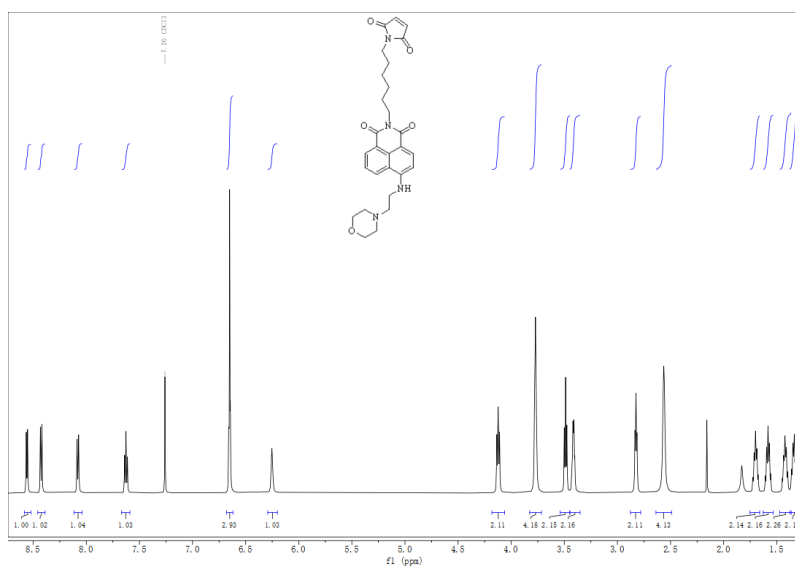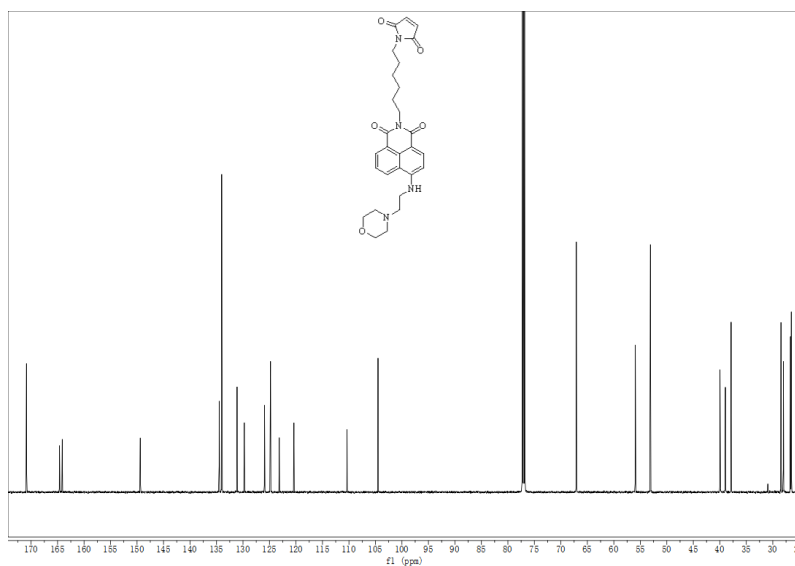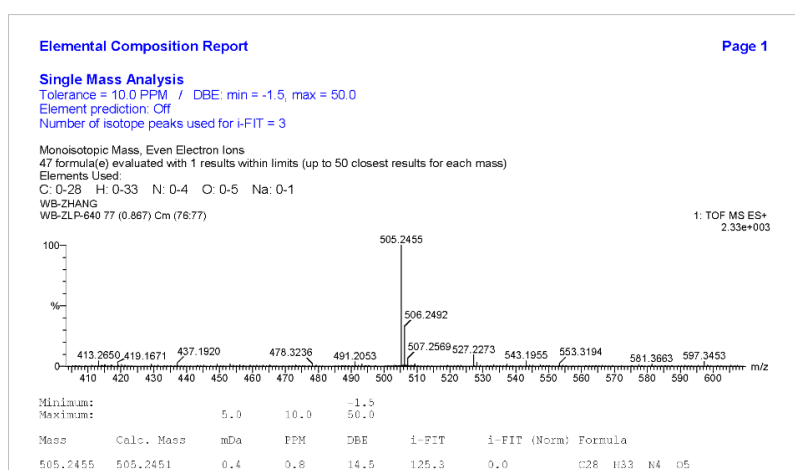

**Fig. S6**  $^1\text{H-NMR}$ ,  $^{13}\text{C-NMR}$  and ESI-Mass spectra of **TP3**.



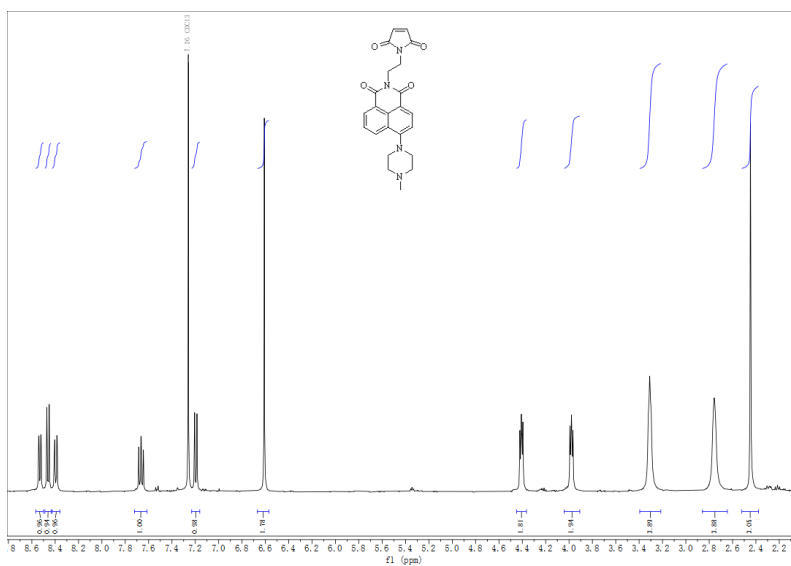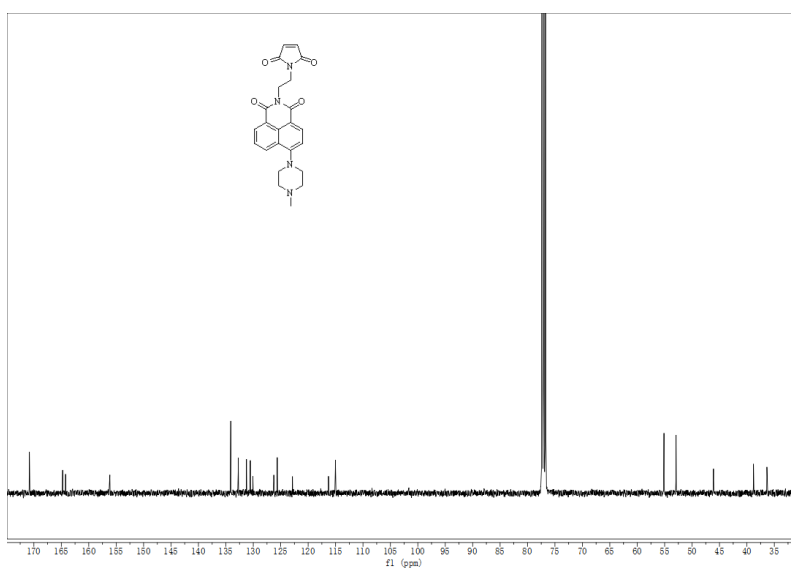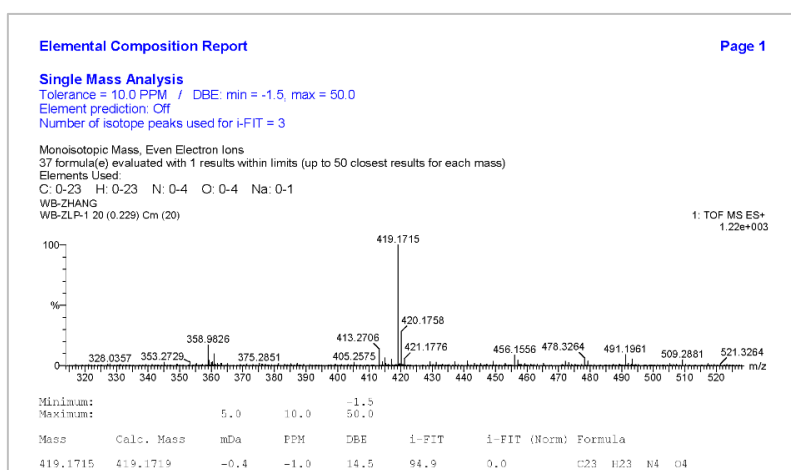

**Fig. S7**  $^1\text{H-NMR}$ ,  $^{13}\text{C-NMR}$  and ESI-Mass spectra of **TP5**.

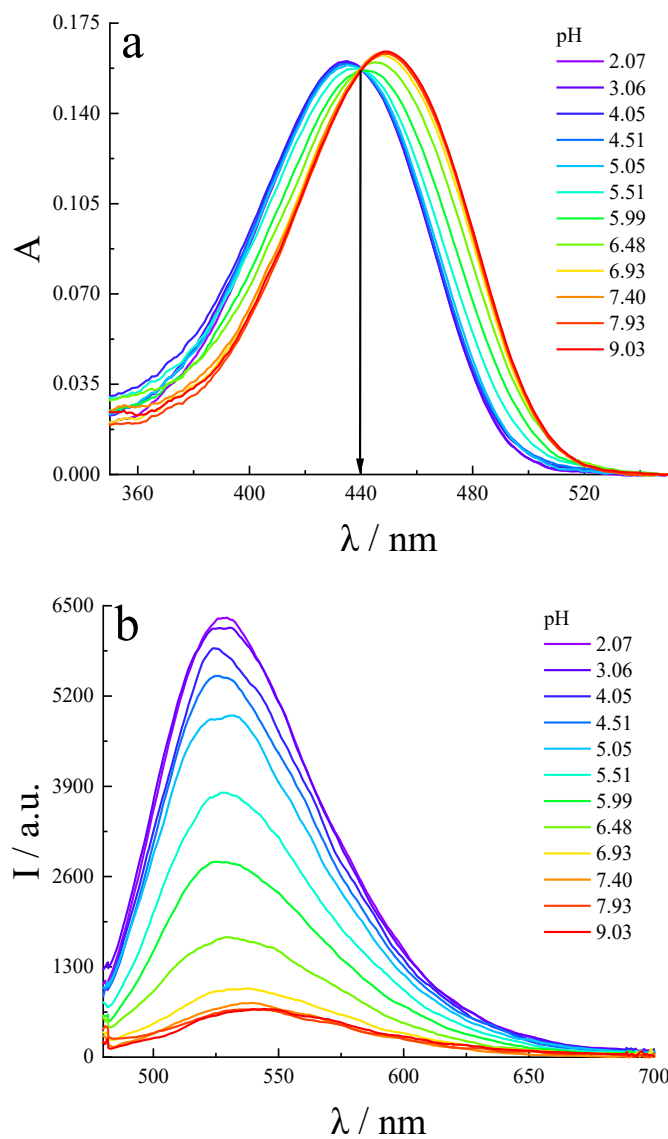

**Fig. S8** pH-dependent absorption (a) and emission (b) spectra of TP2 in 20 mM PBS. [TP2] = 10  $\mu\text{M}$ ,  $\lambda_{\text{ex}}$  = 450 nm.

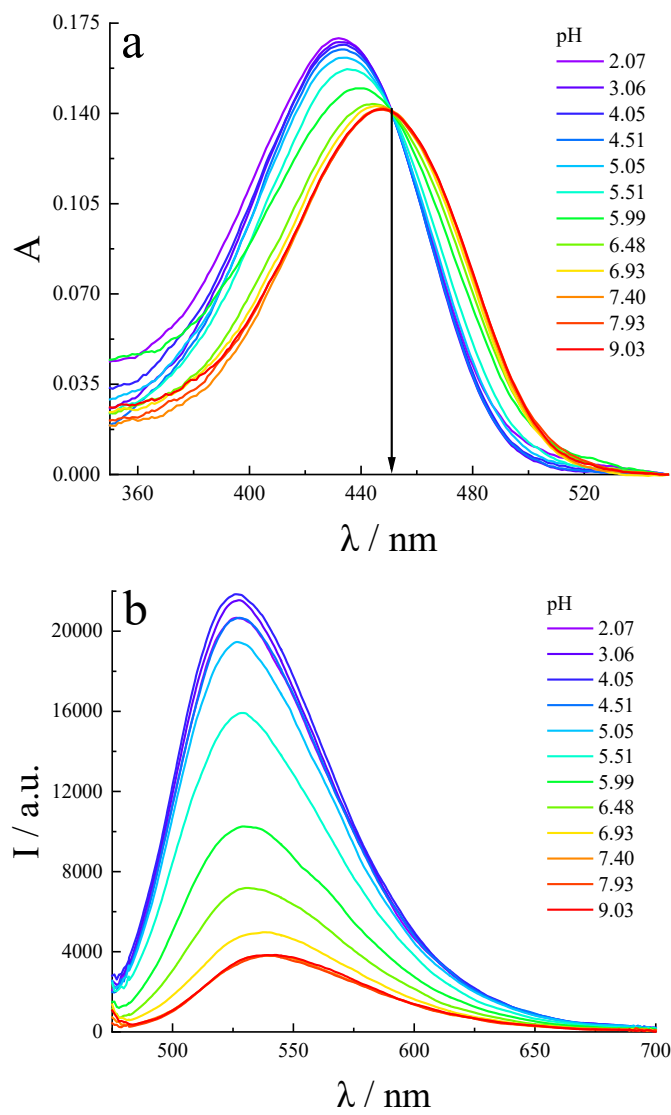

**Fig. S9** pH-dependent absorption (a) and emission (b) spectra of TP3 in 20 mM PBS. [TP3] = 10  $\mu\text{M}$ ,  $\lambda_{\text{ex}}$  = 450 nm.

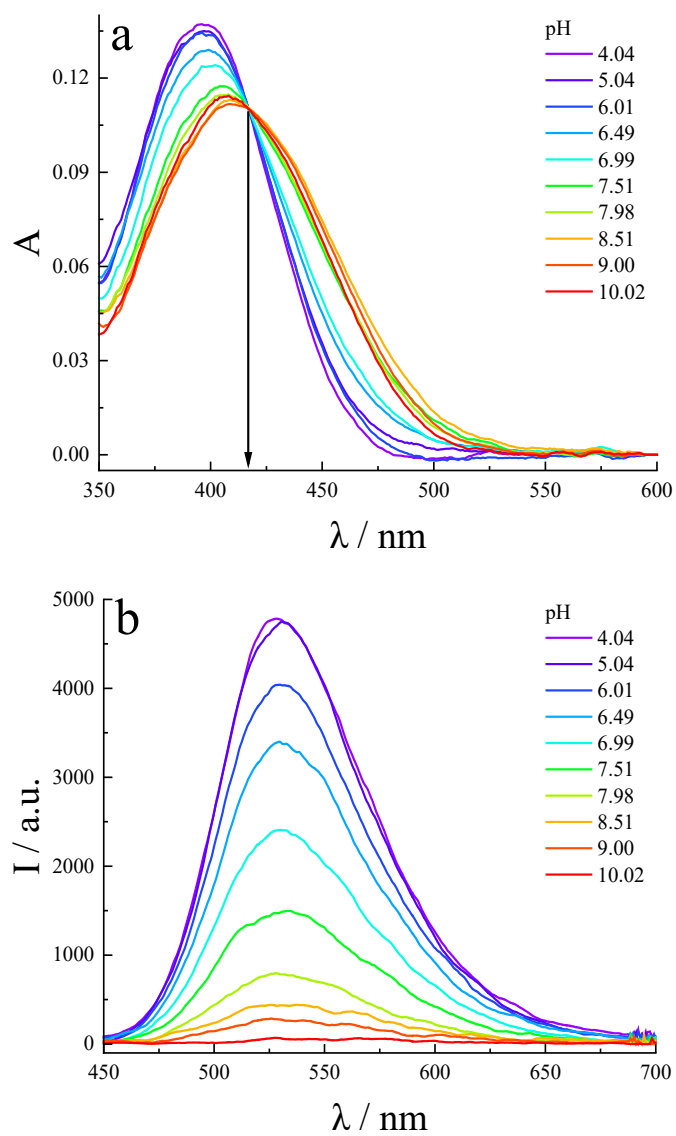

**Fig. S10** pH-dependent absorption (a) and emission (b) spectra of **TP4** in 20 mM PBS. [**TP4**] = 10  $\mu\text{M}$ ,  $\lambda_{\text{ex}}$  = 400 nm.

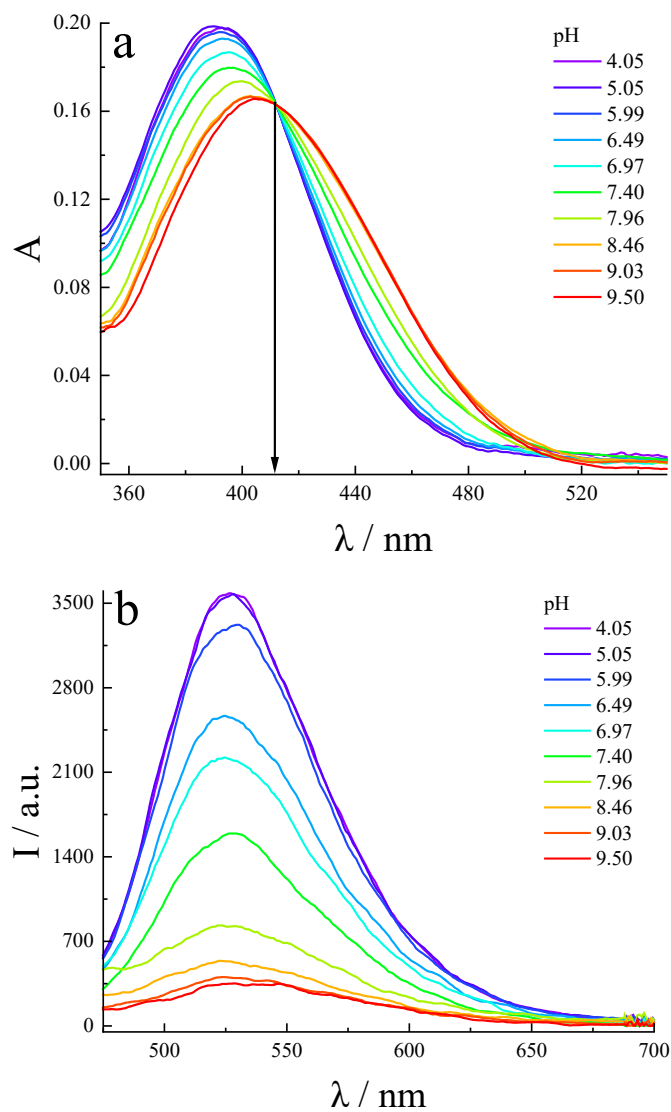

**Fig. S11** pH-dependent absorption (a) and emission (b) spectra of TP5 in 20 mM PBS. [TP5] = 10  $\mu\text{M}$ ,  $\lambda_{\text{ex}} = 400 \text{ nm}$ .

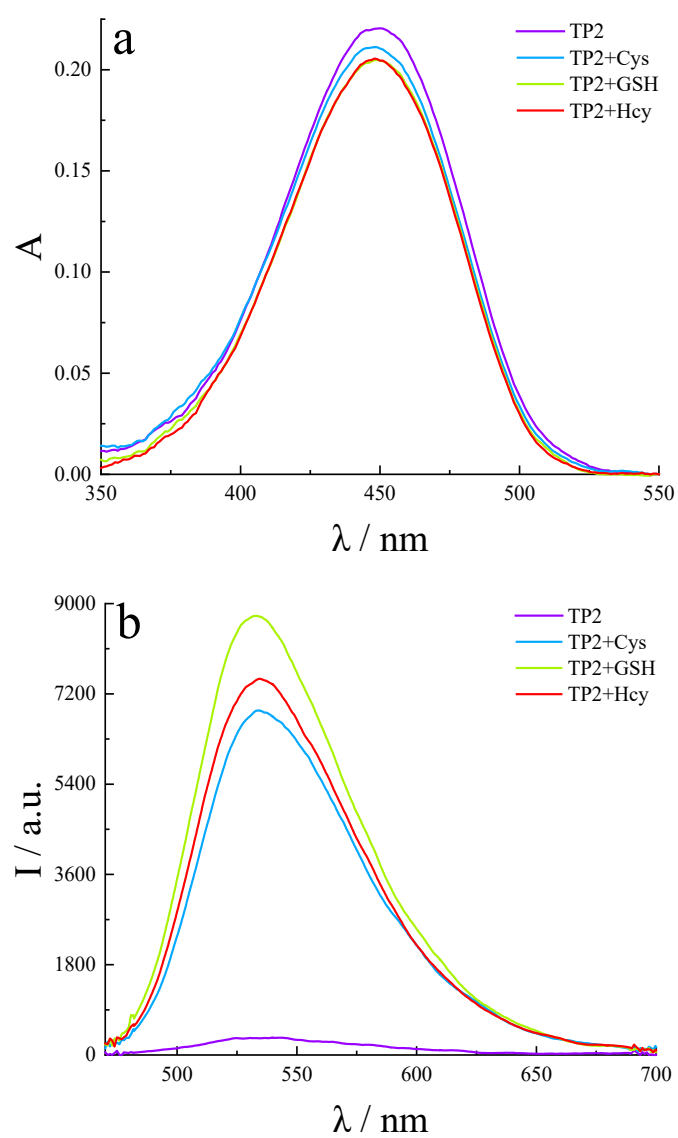

**Fig. S12** Absorption (a) and emission spectra (b) of **TP2** in the presence of 10 equiv. thiol. [**TP2**] = 10  $\mu$ M, [Cys] = 100  $\mu$ M,  $\lambda_{\text{ex}}$  = 450 nm.

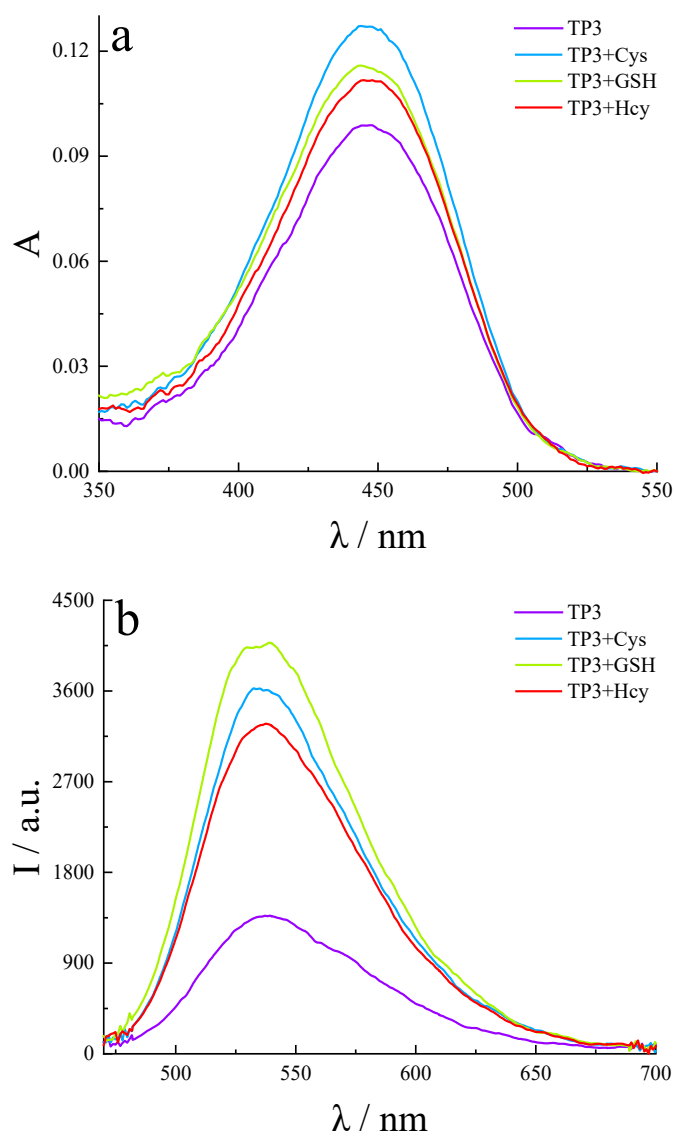

**Fig. S13** Absorption (a) and emission spectra (b) of **TP3** in the presence of 10 equiv. thiol. [**TP3**] = 10  $\mu$ M, [Cys] = 100  $\mu$ M,  $\lambda_{\text{ex}}$  = 450 nm.

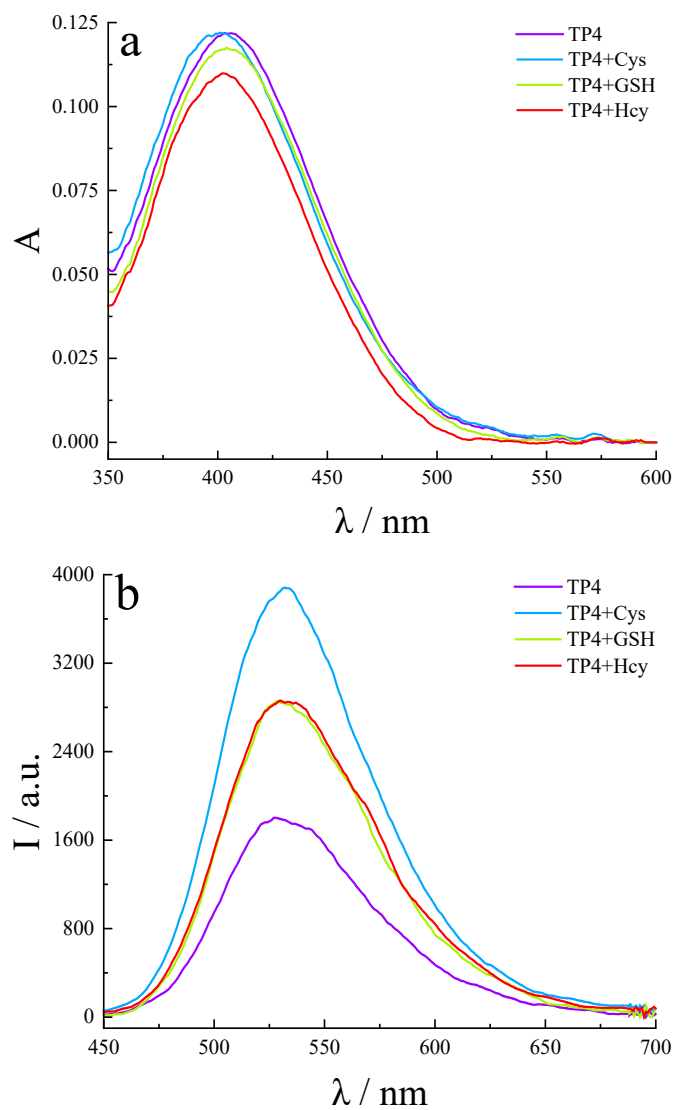

**Fig. S14** Absorption (a) and emission spectra (b) of **TP4** in the presence of 10 equiv. thiol. [**TP4**] = 10  $\mu\text{M}$ , [Cys] = 100  $\mu\text{M}$ ,  $\lambda_{\text{ex}}$  = 400 nm.



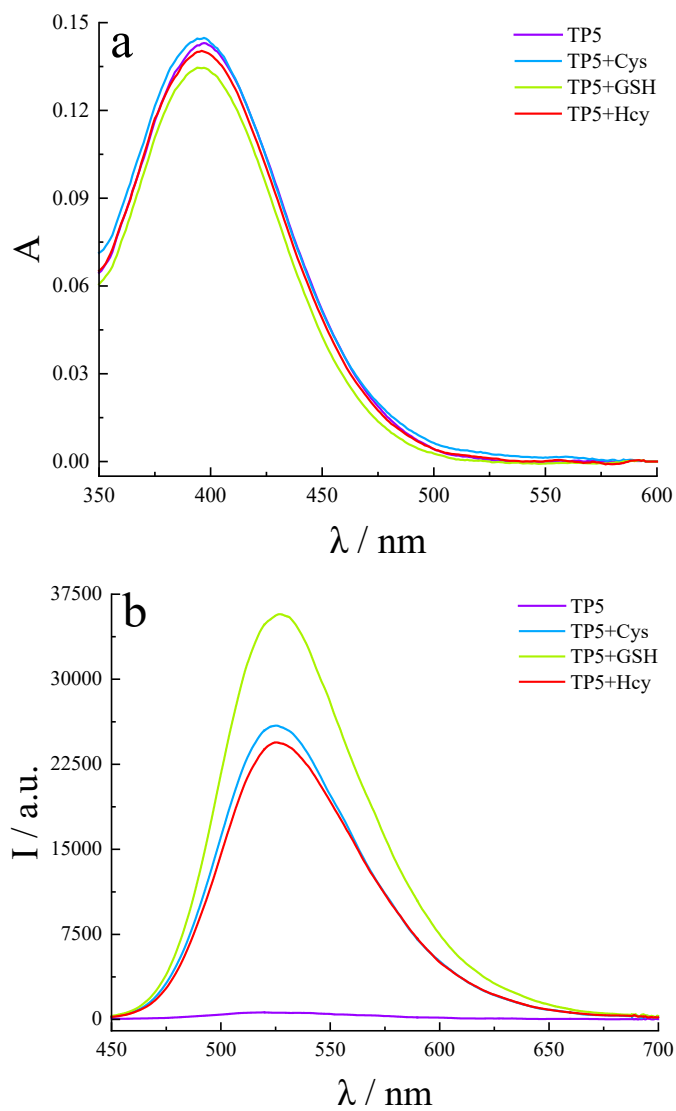

**Fig. S15** Absorption (a) and emission spectra (b) of **TP5** in the presence of 10 equiv. thiol. [**TP5**] = 10  $\mu\text{M}$ , [cys] = 100  $\mu\text{M}$ ,  $\lambda_{\text{ex}}$  = 400 nm.

**Table S1** The thiol detection abilities of some reported fluorescent probes.

| Probe                                                                              | Analyte                              | Detect Time                | Fluorescence Enhancement         | Ref.                                                                     |
|------------------------------------------------------------------------------------|--------------------------------------|----------------------------|----------------------------------|--------------------------------------------------------------------------|
| 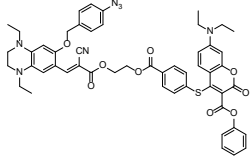  | Cys<br>Hcy<br>GSH                    | 8 min<br>1 h<br>12 min     | 36-fold<br>29-fold<br>26-fold    | Sens. Actuator B-Chem., 2021, <b>331</b> , 129394                        |
|   | GSH                                  | 5 min                      | ~15-fold                         | ACS Sens., 2020, <b>5</b> , 242-249                                      |
|   | Cys<br>Hcy<br>GSH                    | 60 min<br>40 min<br>60 min | ~55-fold                         | J. Photochem. Photobiol. A-Chem. 2022, <b>425</b> , 113654               |
|   | Cys<br>Hcy<br>GSH                    | 5 min                      | 26-fold<br>22-fold<br>24-fold    | Spectroc. Acta Pt. A-Molec. Biomolec. Spectr., 2020, <b>241</b> , 118655 |
|  | Cys<br>Hcy                           | 3 min<br>15 min            | 20-fold<br>15-fold               | Sens. Actuator B-Chem., 2023, <b>374</b> , 132799                        |
| <b>TP2</b>                                                                         | Thiol<br>Proton<br>Thiols and proton | 1 min                      | ~20-fold<br>~9-fold<br>~160-fold | This work                                                                |

**Table S2** The proton detection abilities of some reported fluorescent probe.

| Probe                                                                              | Analyte                              | pK <sub>a</sub> | Fluorescence Enhancement         | Ref.                                                                     |
|------------------------------------------------------------------------------------|--------------------------------------|-----------------|----------------------------------|--------------------------------------------------------------------------|
| 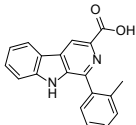  | Proton                               | 6.42            | 120-fold                         | Chem. Biodivers., 2021, <b>18</b> , e2000829                             |
|   | Proton                               | 3.85            | 8.3-fold                         | Sens. Actuator B-Chem., 2017, <b>247</b> , 46-52                         |
|   | Proton                               | 6.54            | ~12-fold                         | Spectroc. Acta Pt. A-Molec. Biomolec. Spectr., 2022, <b>280</b> , 121496 |
|   | Proton                               | 6.8             | 15-fold                          | Angew. Chem.-Int. Edit., 2020, <b>59</b> , 20996-21000                   |
|  | Proton                               | 3.62            | ~425-fold                        | Sens. Actuator B-Chem., 2022, <b>366</b> , 131963                        |
| <b>TP2</b>                                                                         | Thiol<br>Proton<br>Thiols and proton | 5.71            | ~20-fold<br>~9-fold<br>~160-fold | This work                                                                |

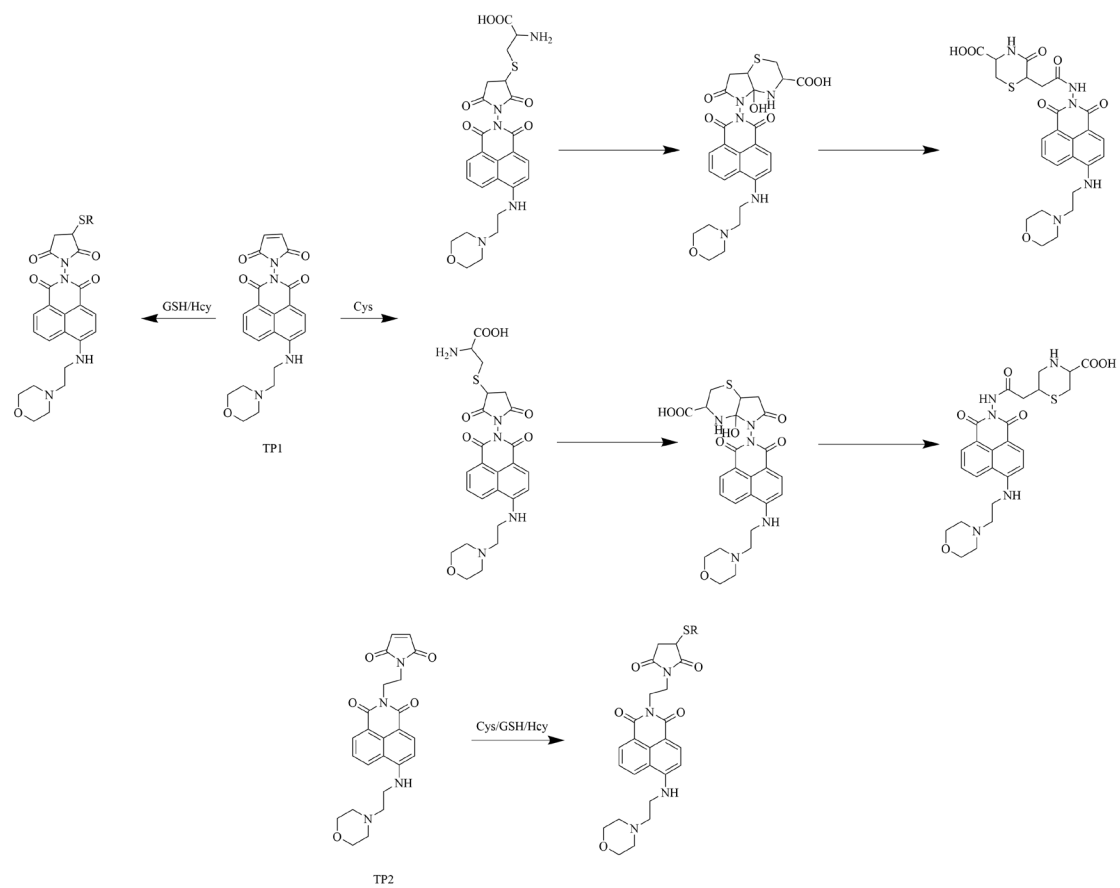

**Scheme S1** The proposed reaction diagram between probe **TP1/TP2** and thiols.

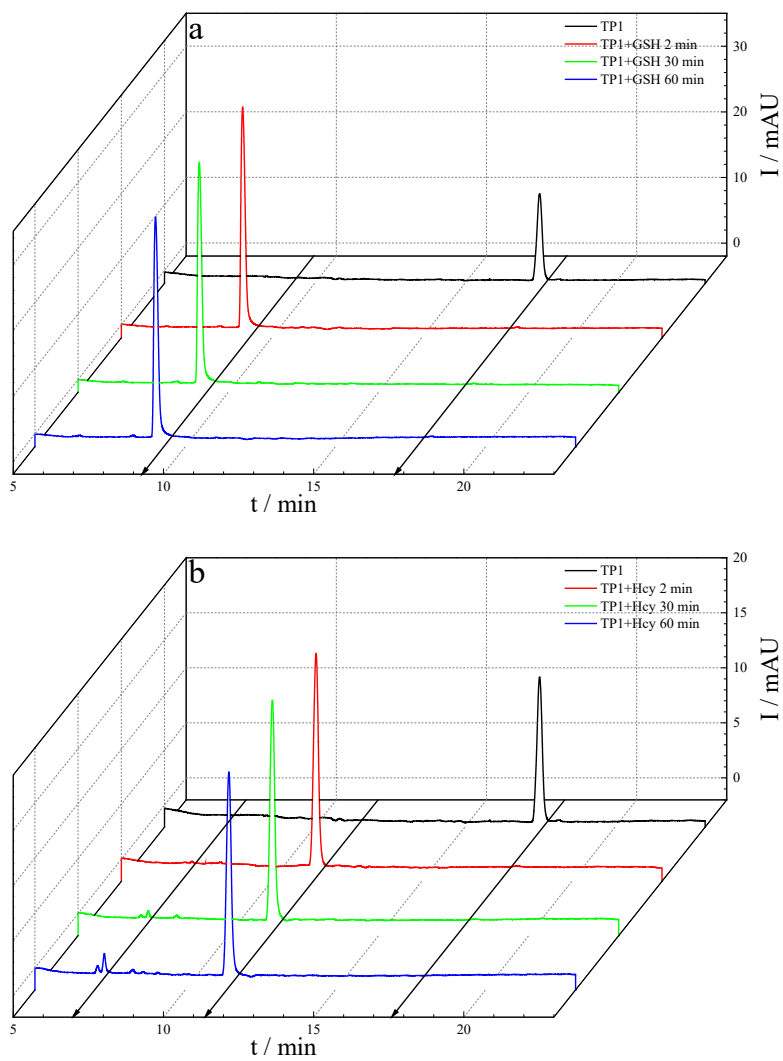

**Fig. S16** HPLC spectra of GSH-TP1 (a)/Hcy-TP1 (b) system at different reaction time. [TP1] = 20  $\mu$ M, [GSH] = [Hcy] = 500  $\mu$ M, 20 mM PBS (pH 7.4), the detection wavelength was 450 nm.

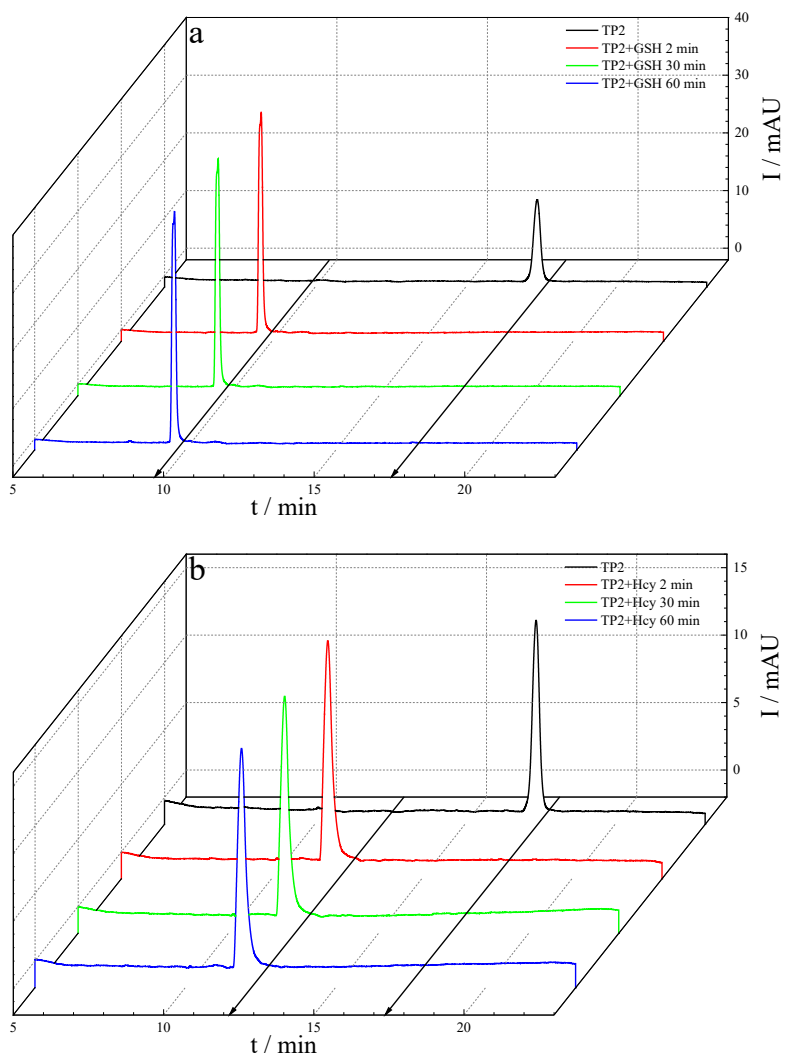

**Fig. S17** HPLC spectra of GSH-TP2 (a)/Hcy-TP2 (b) system at different reaction time. [TP2] = 20  $\mu$ M, [GSH] = [Hcy] = 500  $\mu$ M, 20 mM PBS (pH 7.4), the detection wavelength was 450 nm.

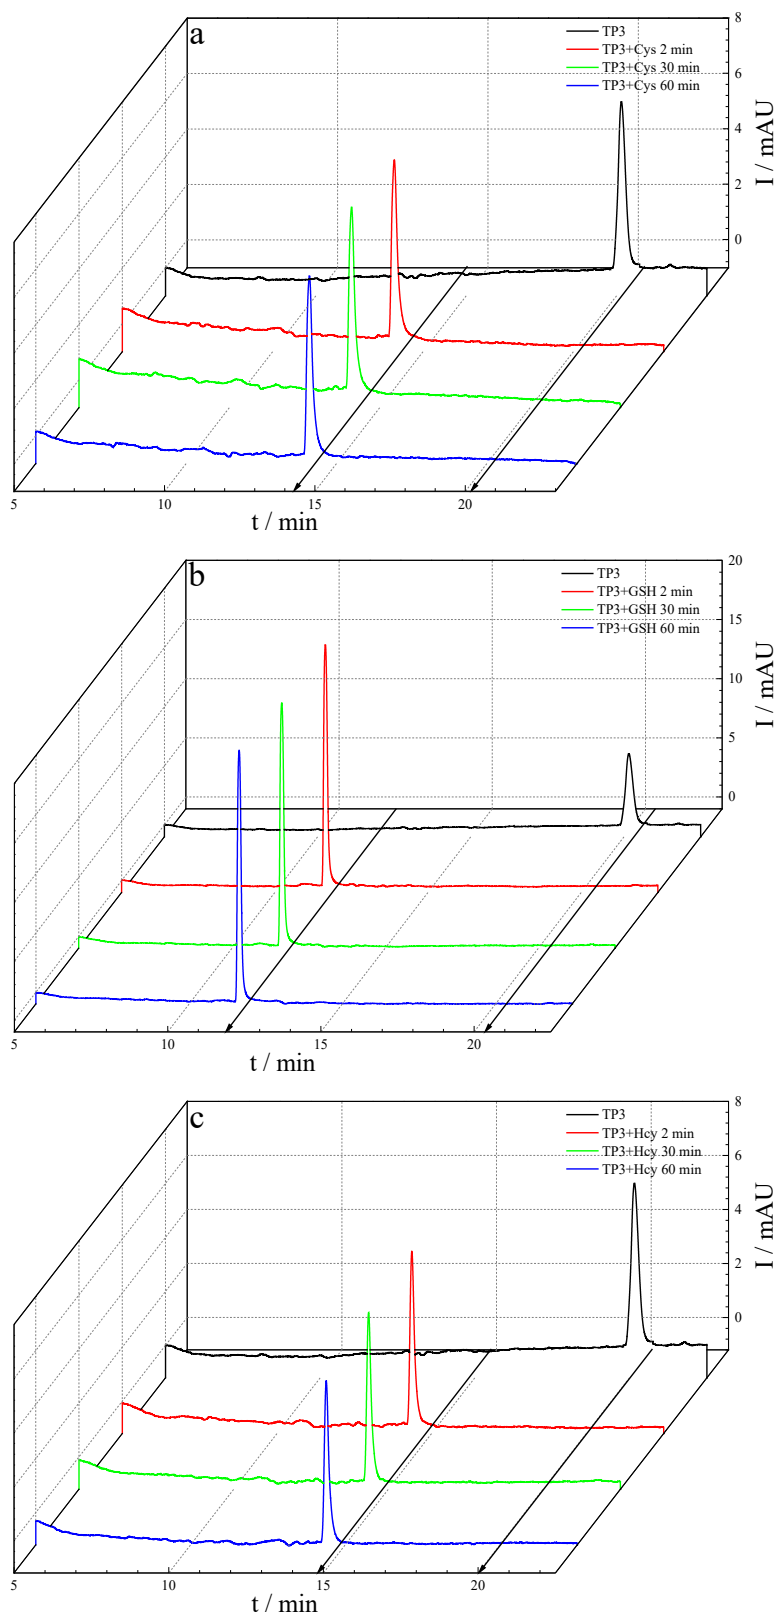

**Fig. S18** HPLC spectra of Cys-TP3 (a)/GSH-TP3 (b)/Hcy-TP3 (c) system at different reaction time. [TP3] = 20  $\mu$ M, [Cys] = [GSH] = [Hcy] = 500  $\mu$ M, 20 mM PBS (pH 7.4), the detection wavelength: 450 nm.

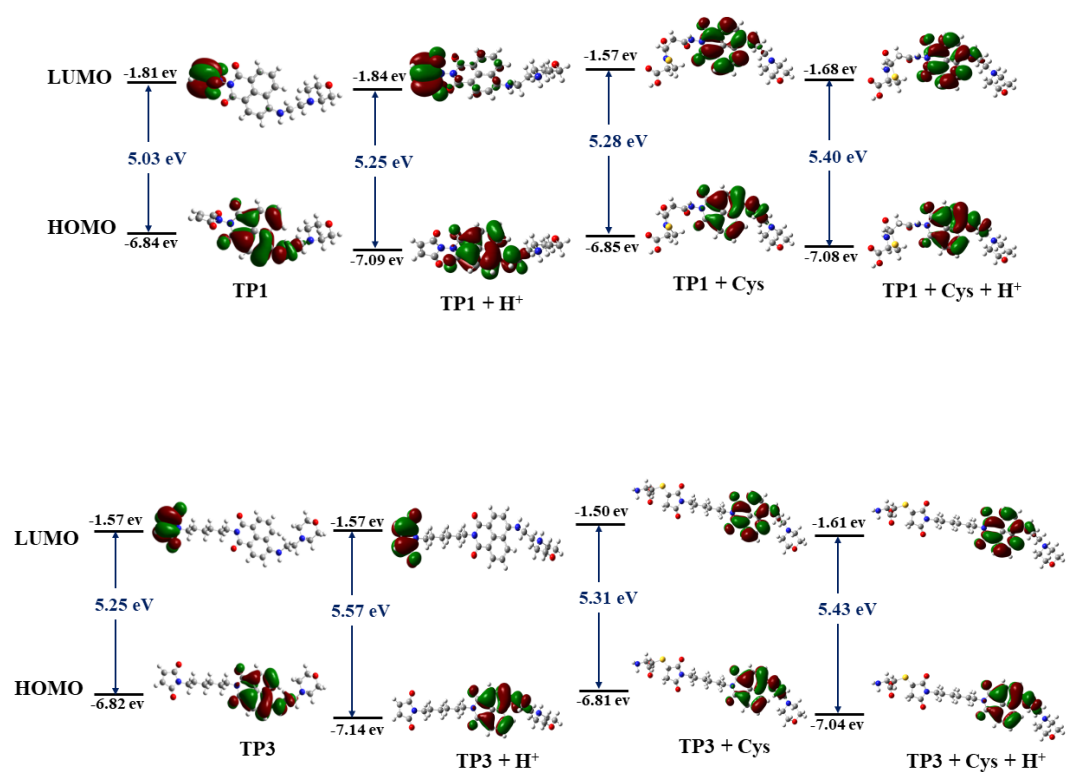

**Fig. S19** The molecular orbitals of **TP1**, **TP3**, and their corresponding reaction products with Cys/proton.



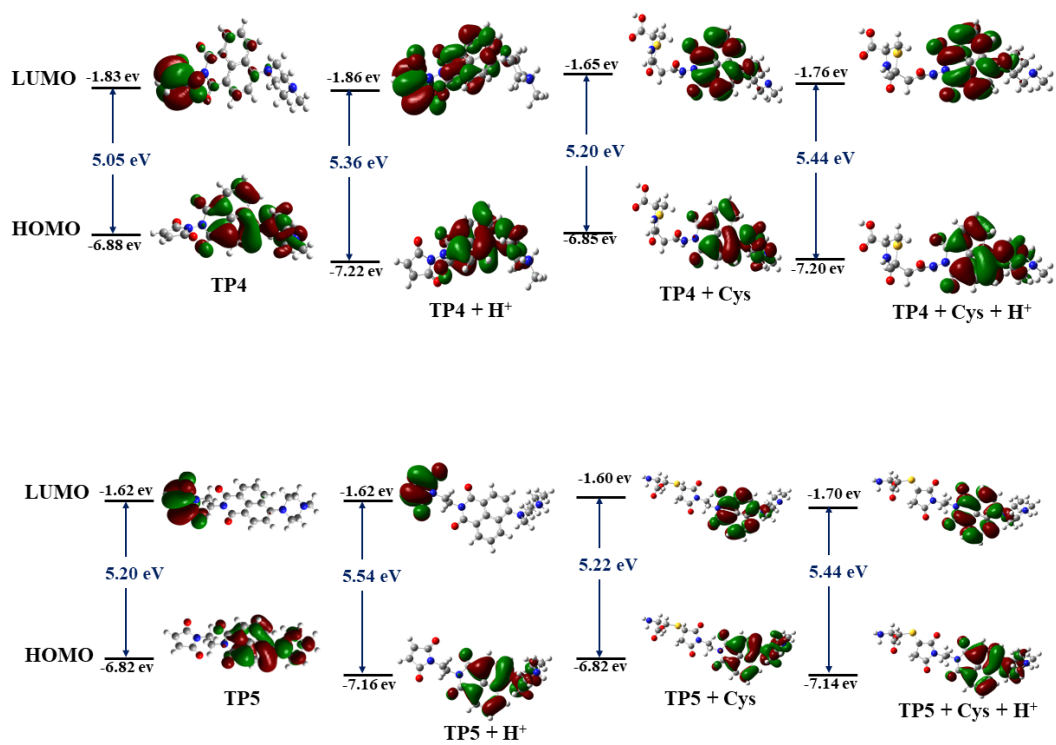

**Fig. S20** The molecular orbitals of **TP4**, **TP5**, and their corresponding reaction products with Cys/proton.

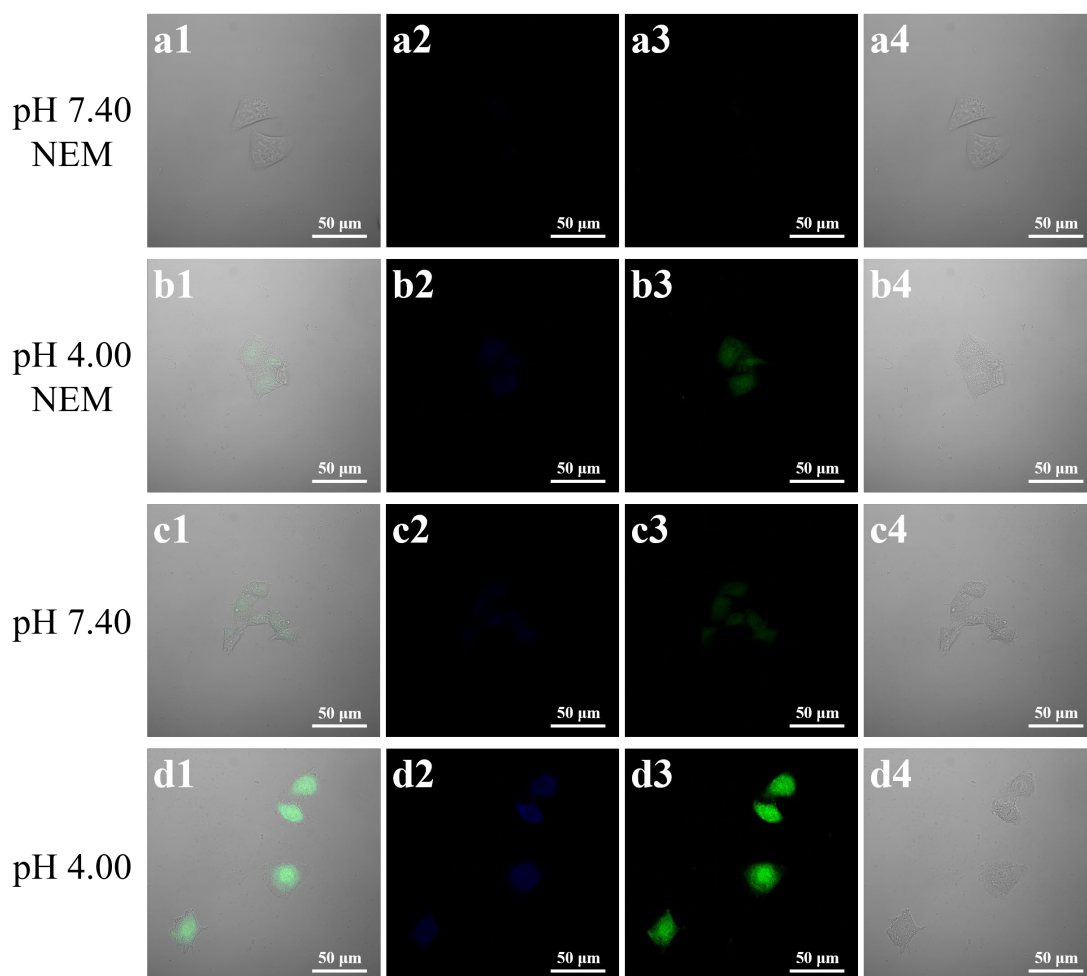

**Fig. S21** Confocal fluorescence imaging of HeLa cells stained with 1  $\mu$ M TP1. (a, b) pre-treated with NEM; and the pH of the high  $K^+$  buffer for imaging was 7.40 (a, c) and 4.00 (b, d). (1) Merged of (2), (3) and (4); (2) blue channel; (3) green channel; (4) bright field. For blue and green channel, collecting 425-475 nm under excited with a 405 nm laser, and collecting 500-550 nm as excited with a 488 nm laser, respectively.

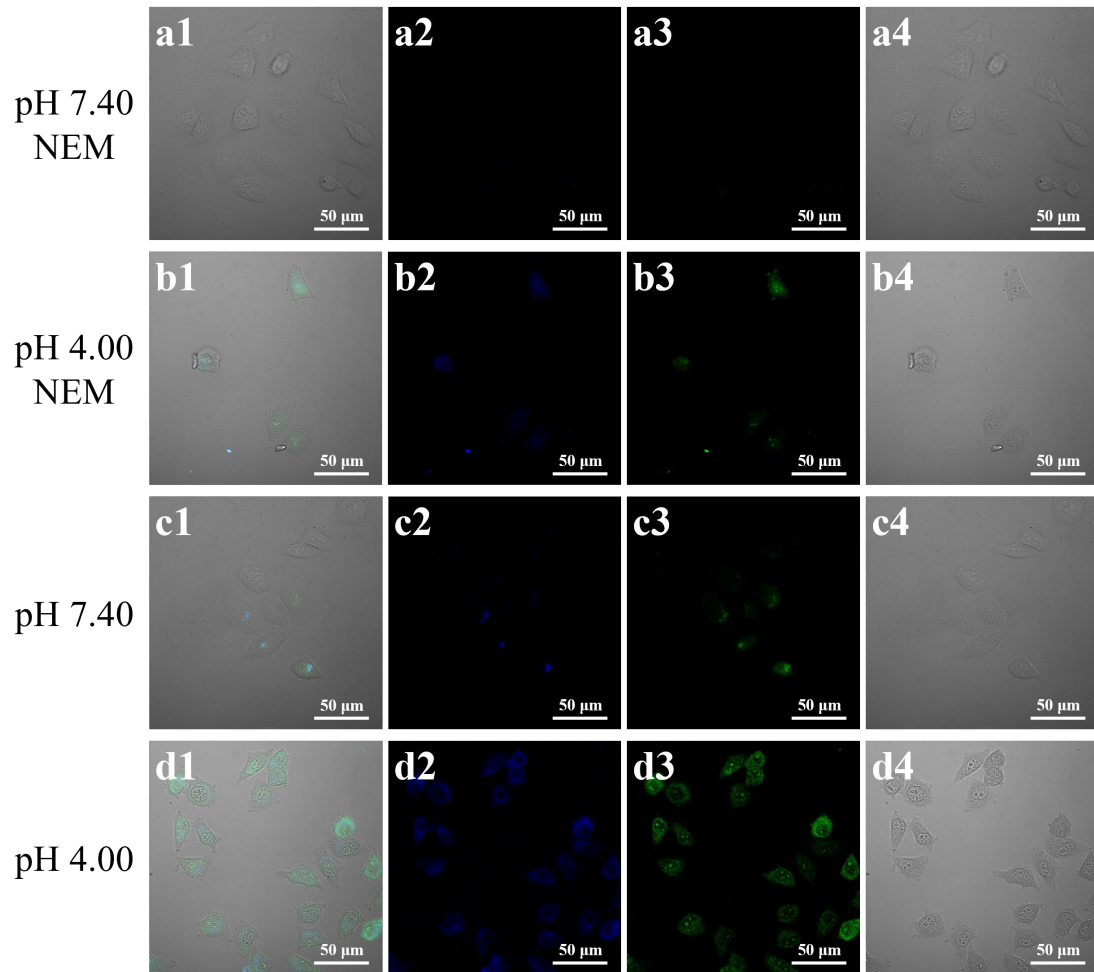

**Fig. S22** Confocal fluorescence imaging of HeLa cells stained with 1  $\mu$ M TP3. (a, b) pre-treated with NEM; and the pH of the high  $K^+$  buffer for imaging was 7.40 (a, c) and 4.00 (b, d). (1) Merged of (2), (3) and (4); (2) blue channel; (3) green channel; (4) bright field. For blue and green channel, collecting 425-475 nm under excited with a 405 nm laser, and collecting 500-550 nm as excited with a 488 nm laser, respectively.

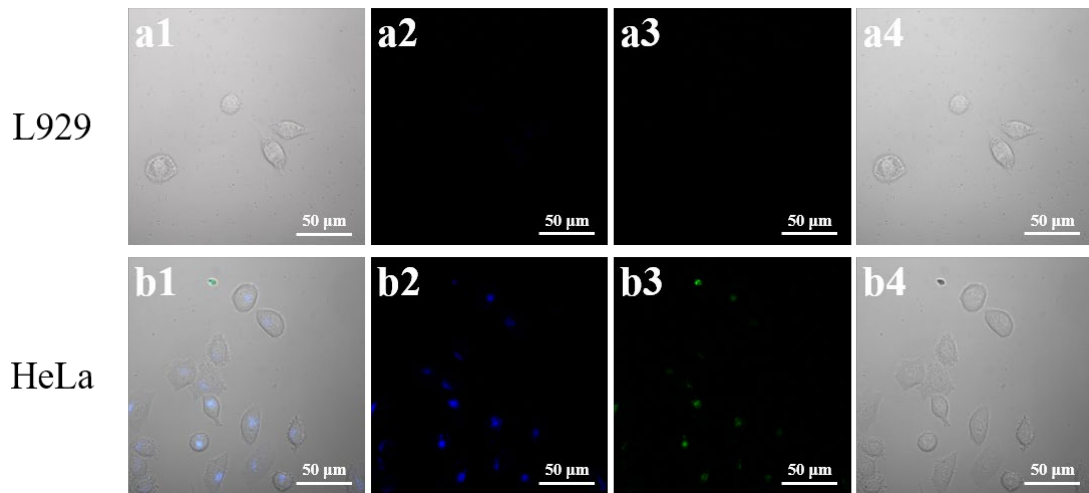

**Fig. S23** Confocal fluorescence imaging of L929 (a) and HeLa (b) cells stained with 1  $\mu$ M TP4. (1) Merged of (2), (3) and (4); (2) blue channel; (3) green channel; (4) bright field.
